# Supplementary material
Source: publisher site journal article supplement (https://www.dovepress.com/article/481127)

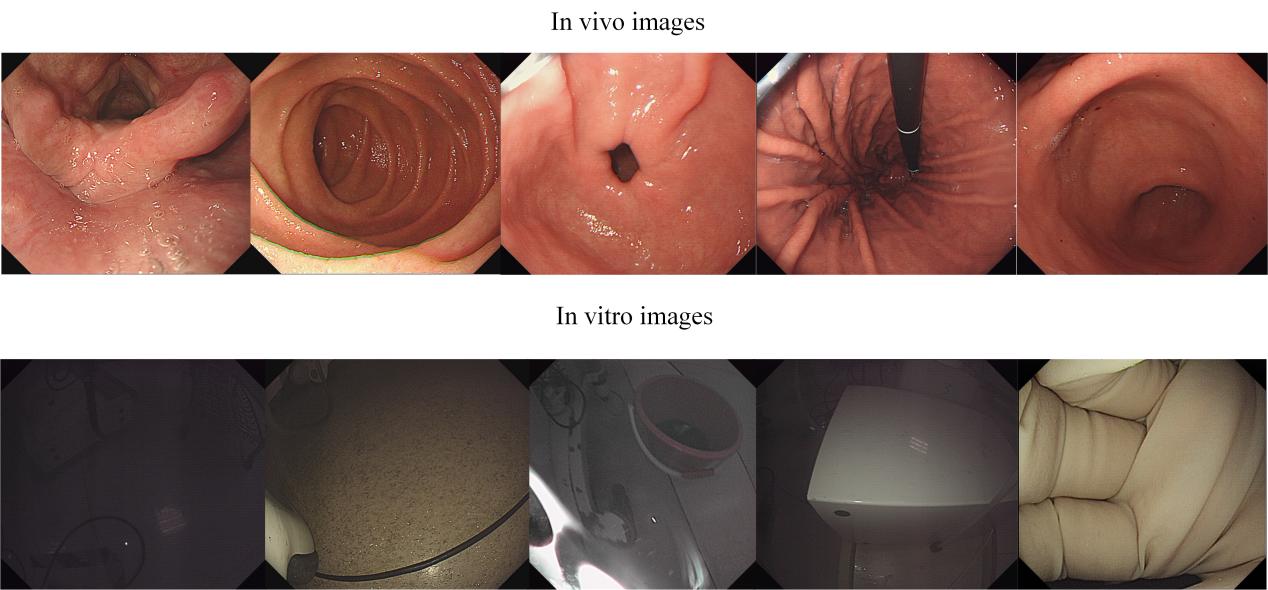


Supplementary figure S1. Representative images of in vivo and in vitro.

Supplement: Supplementary file 1 [file get_supplementary_file.php]
